# Supplementary material for: Multiple Lines of Evidence Support 199 SARS-CoV-2 Positively Selected Amino Acid Sites
Source: MDPI journal article supplement (doi:10.3390/ijms25042428), 2024-02-19
Supplement: s1 [file s1]

**Supplementary Table S2.** SARS-CoV-2 PSS supported by multiple lines of evidence. For each site, the amino acid of the genome of reference is represented, followed by mutations and the date of their first record, according to COV2var database.

| Protein | PSS | Reference a.a. → mutation(s) (first recording)                 |
|---------|-----|----------------------------------------------------------------|
| S       | 5   | L → F (01/2020)                                                |
|         | 9   | P → S (03/2020); L (03/2020)                                   |
|         | 18  | L → F (01/2020); R (03/2020)                                   |
|         | 19  | T → P (04/2020); R (03/2020); I (03/2020)                      |
|         | 67  | A → S (03/2020); V (01/2020)                                   |
|         | 70  | V → I (05/2020); F (03/2020)                                   |
|         | 77  | K → T (08/2020)                                                |
|         | 83  | V → A (05/2020)                                                |
|         | 95  | T → A (03/2020); N (04/2020); I (01/2020)                      |
|         | 97  | K → E (04/2020); T (06/2020); R (04/2020); N (03/2020)         |
|         | 98  | S → P (05/2020); F (01/2020)                                   |
|         | 138 | D → H (03/2020); Y (01/2020)                                   |
|         | 142 | G → S (03/2020); D (03/2020); V (03/2020)                      |
|         | 145 | Y → N (05/2020); H (03/2020); D (03/2020)                      |
|         | 146 | H → N (04/2020); Y (03/2020); L (04/2020); Q (04/2020)         |
|         | 147 | K → E (06/2020); T (06/2020); I (05/2020); N (04-10/2020)      |
|         | 152 | W → R (03-04/2020); L (03/2020); C (01/2020)                   |
|         | 157 | F → S (03/2020); L (02/2020)                                   |
|         | 212 | L → I (08/2020); S (04/2020)                                   |
|         | 213 | V → L (03/2020); E (11/2020); A (04/2020); G (08/2020)         |
|         | 222 | A → V (02/2020)                                                |
|         | 250 | T → A (03/2020); I (03/2020)                                   |
|         | 251 | P → S (04/2020); H (02/2020); L (03/2020)                      |
|         | 252 | G → S (03/2020); D (05/2020); V (04/2020)                      |
|         | 253 | D → N (04/2020); Y (03/2020); A (03/2020); G (01/2020)         |
|         | 368 | L → I (05/2020)                                                |
|         | 371 | S → P (04/2020); F (04/2020)                                   |
|         | 376 | T → A (11/2020)                                                |
|         | 385 | T → I (04/2020)                                                |
|         | 408 | R → I (01/2020); S (09/2020)                                   |
|         | 417 | K → T (04/2020); N (02/2020)                                   |
|         | 440 | N → K (03-05/2020)                                             |
|         | 444 | K → T (02/2021); R (03/2020); M (01/2021); N (04/2020-01/2021) |
|         | 445 | V → L (12/2020); F (04/2020); A (04/2020)                      |
|         | 446 | G → S (04/2020); D (05/2020); V (03/2020)                      |
|         | 452 | L → M (04/2020); Q (03/2020); R (01/2020)                      |
|         | 460 | N → S (04/2020); K (10/2020)                                   |
|         | 477 | S → N (01/2020); I (03/2020); R (04/2020)                      |
|         | 484 | E → K (02/2020); Q (03/2020); A (03/2020); G (04/2020)         |
|         | 486 | F → I (09/2020); L (04/2020); V (07/2020); S (12/2020)         |
|         | 490 | F → L (03/2020); V (05/2020); S (04/2020)                      |
|         | 493 | Q → R (04/2020); L (05/2020)                                   |
|         | 498 | Q → R (04/2020)                                                |
|         | 501 | N → Y (02/2020); T (03/2020)                                   |
|         | 505 | Y → H (04/2020)                                                |
|         | 614 | D → N (03/2020); G (01/2020)                                   |
|         | 655 | H → Y (01/2020)                                                |

|   |      |                                                                    |
|---|------|--------------------------------------------------------------------|
|   | 658  | $N \rightarrow D$ (03/2020); S (09/2020)                           |
|   | 680  | $S \rightarrow F$ (03/2020)                                        |
|   | 681  | $P \rightarrow S$ (03/2020); H (01/2020); R (05/2020); L (03/2020) |
|   | 764  | $N \rightarrow K$ (01/2020)                                        |
|   | 950  | $D \rightarrow N$ (03/2020)                                        |
|   | 1147 | $S \rightarrow L$ (03/2020)                                        |
|   | 1219 | $G \rightarrow C$ (01/2020); V (03/2020)                           |
| N | 3    | $D \rightarrow H$ (03/2020); Y (03/2020); V (03/2020); E (03/2020) |
|   | 9    | $Q \rightarrow L$ (04/2020); H (03/2020)                           |
|   | 24   | $T \rightarrow A$ (10/2020); N (02/2020); I (03/2020)              |
|   | 25   | $G \rightarrow C$ (03/2020); D (04/2020); V (03/2020)              |
|   | 28   | $Q \rightarrow R$ (03/2020); H (03/2020)                           |
|   | 32   | $R \rightarrow C$ (03/2020); H (03/2020)                           |
|   | 33   | $S \rightarrow G$ (01/2020); C (10/2020); N (03/2020); I (03/2020) |
|   | 63   | $D \rightarrow N$ (03/2020); Y (03/2020); G (06/2020)              |
|   | 67   | $P \rightarrow S$ (01/2020); L (03/2020)                           |
|   | 90   | $A \rightarrow T$ (03/2020); S (03/2020); V (04/2020)              |
|   | 135  | $T \rightarrow A$ (06/2020); I (03/2020)                           |
|   | 136  | $E \rightarrow D$ (04/2020)                                        |
|   | 178  | $G \rightarrow S$ (03/2020); V (07/2020)                           |
|   | 199  | $P \rightarrow S$ (02/2020); L (01/2020)                           |
|   | 202  | $S \rightarrow C$ (02/2020); N (01/2020); T (02/2020); I (03/2020) |
|   | 204  | $G \rightarrow R$ (01-03/2020); A (04/2020); V (02/2020)           |
|   | 205  | $T \rightarrow N$ (05/2020); I (01/2020)                           |
|   | 215  | $G \rightarrow S$ (02/2020); C (03/2020); V (03/2020)              |
|   | 218  | $A \rightarrow T$ (06/2020); S (03/2020); V (03/2020)              |
|   | 219  | $L \rightarrow F$ (04/2020)                                        |
|   | 235  | $S \rightarrow F$ (01/2020)                                        |
|   | 238  | $G \rightarrow S$ (04/2020); C (03/2020); D (09/2020); V (03/2020) |
|   | 241  | $Q \rightarrow K$ (05/2020); L (03/2020)                           |
|   | 343  | $D \rightarrow H$ (03/2020); G (06/2020)                           |
|   | 365  | $P \rightarrow S$ (02/2020); L (03/2020)                           |
|   | 368  | $P \rightarrow S$ (03/2020); L (01/2020)                           |
|   | 376  | $A \rightarrow T$ (02/2020); V (04/2020)                           |
|   | 377  | $D \rightarrow Y$ (01/2020); A (03/2020); G (03/2020)              |
|   | 379  | $T \rightarrow A$ (05/2020); I (02/2020)                           |
|   | 383  | $P \rightarrow S$ (02/2020); L (02/2020)                           |
|   | 391  | $T \rightarrow I$ (01/2020)                                        |
|   | 413  | $S \rightarrow R$ (06/2020); I (03/2020)                           |
| M | 2    | $A \rightarrow T$ (03/2020); S (01/2020); V (03/2020)              |
|   | 3    | $D \rightarrow N$ (05/2020); Y (03/2020); G (02/2020)              |
|   | 4    | $S \rightarrow F$ (01/2020)                                        |
|   | 6    | $G \rightarrow C$ (03/2020)                                        |
|   | 30   | $T \rightarrow I$ (04/2020)                                        |
|   | 34   | $L \rightarrow F$ (03/2020)                                        |
|   | 63   | $A \rightarrow T$ (01/2020); S (05/2020)                           |
|   | 69   | $A \rightarrow S$ (03/2020); V (03/2020)                           |
|   | 70   | $V \rightarrow I$ (03/2020); L (05/2020); F (03/2020)              |
|   | 82   | $I \rightarrow V$ (08/2020); T (03/2020); S (08/2020)              |
|   | 155  | $H \rightarrow Y$ (03/2020)                                        |

|      |      |                                                                    |
|------|------|--------------------------------------------------------------------|
| E    | 9    | $T \rightarrow A$ (04/2020); I (03/2020)                           |
| NSP1 | 24   | $R \rightarrow C$ (02/2020); L (03/2020)                           |
|      | 28   | $V \rightarrow I$ (04/2020); L (03/2020)                           |
|      | 62   | $P \rightarrow S$ (03/2020)                                        |
|      | 76   | $A \rightarrow V$ (04/2020)                                        |
|      | 87   | $E \rightarrow D$ (03/2020)                                        |
|      | 100  | $S \rightarrow N$ (05/2020)                                        |
|      | 110  | $H \rightarrow Y$ (03/2020); R (04/2020)                           |
|      | 135  | $S \rightarrow N$ (01/2020); R (08/2020)                           |
|      | 137  | $G \rightarrow S$ (03/2020); C (03/2020); D (03/2020); V (02/2020) |
| NSP2 | 27   | $R \rightarrow L$ (03/2020)                                        |
|      | 31   | $A \rightarrow T$ (03/2020); V (02/2020)                           |
|      | 36   | $S \rightarrow T$ (09/2020); Y (08/2020); F (02/2020)              |
|      | 101  | $I \rightarrow V$ (03/2020)                                        |
|      | 112  | $K \rightarrow N$ (03/2020)                                        |
|      | 164  | $C \rightarrow F$ (04/2020)                                        |
|      | 225  | $A \rightarrow D$ (06/2020); V (04/2020)                           |
|      | 339  | $G \rightarrow S$ (01/2020); C (04/2020); D (03/2020)              |
|      | 419  | $A \rightarrow V$ (03/2020)                                        |
|      | 466  | $W \rightarrow L$ (04/2020); C (02/2020)                           |
| NSP3 | 485  | $V \rightarrow I$ (03/2020)                                        |
|      | 10   | $D \rightarrow N$ (04/2020); Y (04/2020)                           |
|      | 24   | $T \rightarrow I$ (04/2020)                                        |
|      | 149  | $A \rightarrow V$ (03/2020)                                        |
|      | 175  | $G \rightarrow S$ (02/2020); C (03/2020); D (05/2020)              |
|      | 183  | $T \rightarrow I$ (03/2020)                                        |
|      | 218  | $D \rightarrow E$ (02/2020)                                        |
|      | 733  | $I \rightarrow V$ (03/2020); T (04/2020)                           |
|      | 1228 | $P \rightarrow S$ (03/2020); L (03/2020)                           |
|      | 1250 | $T \rightarrow I$ (01/2020)                                        |
| NSP4 | 1412 | $I \rightarrow T$ (03/2020)                                        |
|      | 92   | $A \rightarrow V$ (04/2020)                                        |
|      | 94   | $V \rightarrow A$ (08/2020)                                        |
|      | 264  | $L \rightarrow F$ (02/2020)                                        |
|      | 327  | $T \rightarrow A$ (05/2020); I (12/2019)                           |
|      | 438  | $L \rightarrow I$ (08/2020); F (01/2020); P (01/2020)              |
| NSP5 | 492  | $T \rightarrow A$ (04/2020); I (01/2020)                           |
|      | 104  | $V \rightarrow I$ (04/2020)                                        |
| NSP6 | 132  | $P \rightarrow S$ (03/2020); H (01/2020); L (03/2020)              |
|      | 2    | $A \rightarrow V$ (03/2020)                                        |
|      | 11   | $H \rightarrow Y$ (03/2020); Q (04/2020)                           |
|      | 37   | $L \rightarrow F$ (01/2020)                                        |
|      | 162  | $I \rightarrow V$ (07/2020); T (03/2020)                           |
|      | 182  | $V \rightarrow I$ (03/2020); F (05/2020)                           |
|      | 195  | $E \rightarrow D$ (01/2020)                                        |
| NSP7 | 197  | $C \rightarrow F$ (04/2020)                                        |
|      | NA   | NA                                                                 |
| NSP8 | 17   | $T \rightarrow A$ (03/2020)                                        |
|      | 24   | $Q \rightarrow R$ (04/2020); H (04/2020)                           |

|       |      |                                                                          |
|-------|------|--------------------------------------------------------------------------|
|       | 145  | $T \rightarrow I$ (03/2020)                                              |
|       | 148  | $T \rightarrow A$ (03/2020); $I$ (01/2020)                               |
| NSP9  | 21   | $T \rightarrow N$ (04/2020); $I$ (03/2020)                               |
|       | 24   | $T \rightarrow I$ (01/2020)                                              |
|       | 34   | $T \rightarrow I$ (03/2020)                                              |
|       | 35   | $T \rightarrow I$ (03/2020)                                              |
|       | 36   | $K \rightarrow R$ (04/2020); $N$ (01/2020)                               |
|       | 39   | $R \rightarrow K$ (04/2020)                                              |
| NSP10 | 84   | $P \rightarrow S$ (03/2020); $L$ (03/2020)                               |
|       | 104  | $A \rightarrow T$ (06/2020); $V$ (03/2020)                               |
|       | 134  | $R \rightarrow S$ (03/2020); $C$ (03/2020); $H$ (04/2020); $L$ (03/2020) |
| NSP12 | 323  | $P \rightarrow S$ (02/2020); $L$ (01/2020)                               |
|       | 671  | $G \rightarrow S$ (03/2020); $C$ (03/2020); $V$ (04/2020)                |
|       | 694  | $F \rightarrow Y$ (06/2020)                                              |
| NSP13 | 36   | $S \rightarrow P$ (02/2020)                                              |
|       | 77   | $P \rightarrow Q$ (03/2020); $L$ (02/2020)                               |
|       | 164  | $H \rightarrow Y$ (03/2020)                                              |
|       | 260  | $D \rightarrow Y$ (01/2020)                                              |
|       | 392  | $R \rightarrow C$ (01/2020)                                              |
|       | 460  | $K \rightarrow R$ (03/2020)                                              |
| NSP14 | 42   | $I \rightarrow V$ (01/2020); $L$ (04/2020)                               |
|       | 43   | $P \rightarrow S$ (03/2020); $L$ (01/2020)                               |
|       | 129  | $N \rightarrow D$ (01/2020)                                              |
|       | 374  | $S \rightarrow A$ (03/2020); $F$ (03/2020)                               |
| NSP15 | 80   | $A \rightarrow V$ (04/2020)                                              |
|       | 259  | $K \rightarrow R$ (04/2020); $N$ (04/2020)                               |
|       | 282  | $D \rightarrow N$ (03/2020); $Y$ (04/2020); $G$ (03/2020)                |
| NSP16 | 6938 | $T \rightarrow I$ (03/2020)                                              |
|       | 6949 | $T \rightarrow I$ (02/2020)                                              |
|       | 6977 | $D \rightarrow Y$ (03/2020); $G$ (03/2020)                               |
|       | 7013 | $P \rightarrow T$ (08/2020); $S$ (05/2020); $L$ (03/2020)                |
|       | 7014 | $R \rightarrow S$ (03/2020); $C$ (01/2020); $H$ (03/2020); $L$ (03/2020) |
|       | 7034 | $P \rightarrow S$ (03/2020); $L$ (03/2020)                               |
|       | 7036 | $Q \rightarrow H$ (03/2020)                                              |
| ORF3a | 26   | $S \rightarrow L$ (03/2020)                                              |
|       | 57   | $Q \rightarrow H$ (01-03/2020)                                           |
|       | 106  | $L \rightarrow F$ (2/2020)                                               |
|       | 108  | $L \rightarrow V$ (04/2020); $F$ (03/2020)                               |
|       | 110  | $A \rightarrow S$ (02/2020); $V$ (01/2020)                               |
|       | 155  | $D \rightarrow H$ (02/2020); $Y$ (02/2020)                               |
|       | 172  | $G \rightarrow R$ (02/2020); $C$ (03/2020); $D$ (03/2020); $V$ (01/2020) |
|       | 223  | $T \rightarrow S$ (12/2020); $N$ (04/2020); $I$ (02/2020)                |
|       | 224  | $G \rightarrow R$ (03/2020); $C$ (02/2020); $V$ (03/2020)                |
|       | 229  | $T \rightarrow N$ (10/2020); $I$ (03/2020)                               |
| ORF6  | NA   | NA                                                                       |
| ORF7a | 45   | $P \rightarrow S$ (03/2020); $L$ (02/2020)                               |
|       | 82   | $V \rightarrow F$ (03/2020); $A$ (05/2020)                               |
|       | 116  | $L \rightarrow F$ (01/2020)                                              |
|       | 4    | $L \rightarrow F$ (03/2020)                                              |

|       |     |                                           |
|-------|-----|-------------------------------------------|
| ORF7b | 40  | T → I (03/2020)                           |
|       | 42  | H → Y (03/2020)                           |
|       | 43  | A → T (03/2020); S (03/2020); V (01/2020) |
| ORF8  | 84  | L → S (12/2019)                           |
|       | 100 | V → L (01/2020)                           |
|       | 121 | I → L (02/2020); F (03/2020); T (04/2020) |
| ORF10 | NA  | NA                                        |
