# Supplementary material for: Multiple Lines of Evidence Support 199 SARS-CoV-2 Positively Selected Amino Acid Sites
Source: MDPI journal article supplement (doi:10.3390/ijms25042428), 2024-02-19
Supplement: s1 [file s1]

**Supplementary Table S1.** PSS summary for the amino acid sites showing the 10 most frequent mutations. No information is available for ORF10 in the SARS2mutant database.

| Protein | Position | Frequency | Detection                   |
|---------|----------|-----------|-----------------------------|
| S       | 614      | 97.6      | This Work                   |
|         | 484      | 16.8      | FUBAR; This Work            |
|         | 18       | 16.2      | FUBAR; This Work            |
|         | 222      | 15.0      | FUBAR; This Work            |
|         | 501      | 13.6      | FUBAR; This Work            |
|         | 655      | 12.8      | FUBAR; This Work            |
|         | 417      | 12.1      | FEL; FUBAR; MEME; This Work |
|         | 681      | 10.7      | FUBAR; This Work            |
|         | 1176     | 10.7      | FUBAR                       |
|         | 138      | 10.1      | FEL; FUBAR; MEME            |
| N       | 203      | 86.4      | NA                          |
|         | 377      | 63.3      | FEL; FUBAR; MEME; This Work |
|         | 63       | 62.2      | FEL; FUBAR; MEME; This Work |
|         | 215      | 56.8      | FUBAR; This Work            |
|         | 204      | 23.5      | This Work                   |
|         | 3        | 17.2      | FUBAR; MEME; This Work      |
|         | 235      | 17.3      | FUBAR; This Work            |
|         | 9        | 4.6       | FEL; FUBAR; MEME            |
|         | 199      | 2.6       | FUBAR; This Work            |
|         | 220      | 2.6       | NA                          |
| M       | 82       | 47.2      | FUBAR; This Work            |
|         | 63       | 24.8      | This Work                   |
|         | 19       | 24.7      | FUBAR                       |
|         | 3        | 16.1      | FEL; FUBAR; MEME; This Work |
|         | 2        | <1        | This work                   |
|         | 70       | <1        | FUBAR; This Work            |
|         | 81       | <1        | NA                          |
|         | 28       | <1        | FUBAR                       |
|         | 30       | <1        | FEL; FUBAR; MEME            |
|         | 197      | <1        | NA                          |
| E       | 9        | 30.6      | This Work                   |
|         | 71       | <1        | NA                          |
|         | 62       | <1        | NA                          |
|         | 21       | <1        | NA                          |
|         | 58       | <1        | FEL                         |
|         | 73       | <1        | NA                          |
|         | 55       | <1        | NA                          |
|         | 68       | <1        | FEL                         |
|         | 49       | <1        | NA                          |
|         | 24       | <1        | FEL; FUBAR                  |
| NSP1    | 135      | 8.0       | This Work                   |
|         | 87       | <1        | FEL; FUBAR; MEME            |
|         | 110      | <1        | FEL; FUBAR; MEME; This Work |
|         | 24       | <1        | FUBAR; This Work            |
|         | 124      | <1        | NA                          |
|         | 28       | <1        | FEL; FUBAR; MEME            |
|         | 100      | <1        | This Work                   |
|         | 37       | <1        | NA                          |
|         | 120      | <1        | NA                          |
|         | 62       | <1        | FEL; FUBAR; MEME            |
| NSP2    | 85       | 3.9       | FUBAR                       |
|         | 81       | 2.2       | FUBAR                       |
|         | 129      | 1.4       | FUBAR                       |
|         | 550      | <1        | FUBAR; MEME                 |
|         | 339      | <1        | FEL; FUBAR; MEME            |
|         | 419      | <1        | FEL; FUBAR; MEME            |
|         | 318      | <1        | FUBAR                       |
|         | 587      | <1        | FEL; FUBAR                  |
|         | 27       | <1        | FEL; FUBAR; MEME            |
|         | 485      | <1        | FEL; FUBAR; MEME            |
| NSP3    | 1228     | 50.0      | FEL; FUBAR; MEME            |
|         | 1469     | 50.0      | FEL; FUBAR                  |
|         | 488      | 49.5      | FUBAR                       |
|         | 183      | 16.4      | NA                          |
|         | 890      | 16.3      | FUBAR                       |
|         | 1412     | 16.3      | FUBAR                       |
|         | 1711     | 16.3      | NA                          |
|         | 489      | 11.3      | NA                          |
|         | 24       | 11.3      | FUBAR                       |

|       |     |      |                             |
|-------|-----|------|-----------------------------|
|       | 822 | 5.2  | FUBAR                       |
|       | 492 | 70.5 | FUBAR; This Work            |
|       | 167 | 38.0 | FUBAR                       |
|       | 438 | 10.0 | FUBAR; This Work            |
|       | 264 | 10.0 | This Work                   |
| NSP4  | 327 | 9.6  | FUBAR; This Work            |
|       | 446 | 4.2  | NA                          |
|       | 94  | <1   | FEL; FUBAR; MEME            |
|       | 146 | <1   | NA                          |
|       | 17  | <1   | NA                          |
|       | 92  | <1   | FEL; FUBAR; MEME            |
|       | 132 | 30.9 | This Work                   |
|       | 90  | 1.7  | FUBAR                       |
|       | 89  | 1.5  | FUBAR                       |
|       | 169 | <1   | NA                          |
| NSP5  | 108 | <1   | NA                          |
|       | 260 | <1   | FUBAR                       |
|       | 15  | <1   | NA                          |
|       | 88  | <1   | NA                          |
|       | 21  | <1   | NA                          |
|       | 96  | <1   | FEL; FUBAR                  |
|       | 77  | 71.2 | NA                          |
|       | 149 | 7.7  | FUBAR                       |
|       | 181 | 5.6  | FUBAR                       |
|       | 162 | 3.4  | FEL; FUBAR; MEME            |
| NSP6  | 37  | 3.0  | FEL; FUBAR; MEME; This Work |
|       | 197 | 2.5  | FEL; FUBAR; MEME            |
|       | 2   | 1.2  | FEL; FUBAR; MEME            |
|       | 49  | <1   | NA                          |
|       | 11  | <1   | FEL; FUBAR; MEME            |
|       | 160 | <1   | FUBAR                       |
|       | 71  | <1   | NA                          |
|       | 25  | <1   | NA                          |
|       | 56  | <1   | FEL; FUBAR                  |
|       | 77  | <1   | NA                          |
| NSP7  | 75  | <1   | NA                          |
|       | 3   | <1   | NA                          |
|       | 26  | <1   | NA                          |
|       | 81  | <1   | NA                          |
|       | 63  | <1   | NA                          |
|       | 58  | <1   | NA                          |
|       | 24  | <1   | FEL; FUBAR; MEME; This Work |
|       | 145 | <1   | This Work                   |
|       | 141 | <1   | NA                          |
|       | 148 | <1   | This Work                   |
| NSP8  | 187 | <1   | NA                          |
|       | 123 | <1   | NA                          |
|       | 10  | <1   | NA                          |
|       | 89  | <1   | NA                          |
|       | 34  | <1   | NA                          |
|       | 198 | <1   | NA                          |
|       | 35  | <1   | This Work                   |
|       | 65  | <1   | NA                          |
|       | 39  | <1   | FE; FUBAR; MEME             |
|       | 42  | <1   | FUBAR                       |
| NSP9  | 101 | <1   | NA                          |
|       | 24  | <1   | This Work                   |
|       | 11  | <1   | NA                          |
|       | 34  | <1   | This Work                   |
|       | 109 | <1   | NA                          |
|       | 21  | <1   | FUBAR; This Work            |
|       | 102 | <1   | NA                          |
|       | 12  | <1   | NA                          |
|       | 134 | <1   | FEL; FUBAR; MEME; This Work |
|       | 104 | <1   | FUBAR; This Work            |
| NSP10 | 32  | <1   | FEL; FUBAR                  |
|       | 51  | <1   | NA                          |
|       | 111 | <1   | NA                          |
|       | 84  | <1   | This Work                   |
|       | 101 | <1   | NA                          |
|       | 55  | <1   | NA                          |
|       | 323 | 99.3 | This Work                   |
|       | 671 | 42.9 | This Work                   |
| NSP12 | 838 | 3.0  | FUBAR                       |
|       | 192 | 2.6  | NA                          |
|       | 694 | 2.0  | FEL; FUBAR; MEME            |
|       | 227 | 1.9  | NA                          |
|       | 875 | <1   | FEL; FUBAR                  |

|       |     |      |                             |
|-------|-----|------|-----------------------------|
|       | 185 | <1   | NA                          |
|       | 197 | <1   | FUBAR                       |
|       | 776 | <1   | NA                          |
| NSP13 | 77  | 42.6 | FUBAR; This Work            |
|       | 392 | 9.8  | This Work                   |
|       | 334 | 3.1  | FUBAR                       |
|       | 460 | 2.6  | FUBAR; This Work            |
|       | 164 | 1.8  | FEL; FUBAR; MEME            |
|       | 341 | 1.4  | FUBAR                       |
|       | 296 | 1.1  | FUBAR                       |
|       | 261 | <1   | NA                          |
|       | 260 | <1   | FEL; FUBER; MEME            |
|       | 36  | <1   | This Work                   |
| NSP14 | 394 | 35.2 | NA                          |
|       | 42  | 33.9 | This work                   |
|       | 129 | 1.3  | FEL; FUBAR; MEME; This Work |
|       | 46  | <1   | FUBAR                       |
|       | 16  | <1   | FUBAR                       |
|       | 451 | <1   | NA                          |
|       | 323 | <1   | NA                          |
|       | 72  | <1   | FEL; FUBAR                  |
|       | 43  | <1   | FUBAR; This Work            |
|       | 374 | <1   | FEL; FUBAR; MEME            |
| NSP15 | 112 | 9.0  | NA                          |
|       | 205 | <1   | FUBAR                       |
|       | 80  | <1   | FEL; FUBAR; MEME            |
|       | 259 | <1   | This Work                   |
|       | 262 | <1   | NA                          |
|       | 234 | <1   | NA                          |
|       | 127 | <1   | NA                          |
|       | 320 | <1   | FUBAR                       |
|       | 171 | <1   | FUBAR                       |
|       | 33  | <1   | NA                          |
| NSP16 | 216 | 1.8  | FEL; FUBAR; MEME; This Work |
|       | 160 | 1.3  | FUBAR                       |
|       | 238 | 1.0  | FEL; FUBAR; MEME            |
|       | 215 | <1   | FUBAR; This Work            |
|       | 35  | <1   | NA                          |
|       | 179 | <1   | FEL; FUBAR; MEME            |
|       | 287 | <1   | NA                          |
|       | 236 | <1   | This work                   |
|       | 134 | <1   | NA                          |
|       | 140 | <1   | FUBAR; This Work            |
| ORF3a | 26  | 43.2 | This Work                   |
|       | 223 | 10.2 | FUBAR; This Work            |
|       | 57  | 5.1  | This Work                   |
|       | 239 | 2.8  | FUBAR                       |
|       | 106 | 2.2  | FUBAR; This Work            |
|       | 172 | 1.8  | FEL; MEME                   |
|       | 78  | 1.5  | FEL; FUBAR                  |
|       | 253 | 1.3  | NA                          |
|       | 155 | <1   | FEL; FUBAR; MEME            |
|       | 131 | <1   | NA                          |
| ORF6  | 61  | 9.5  | NA                          |
|       | 48  | <1   | NA                          |
|       | 46  | <1   | NA                          |
|       | 57  | <1   | NA                          |
|       | 21  | <1   | NA                          |
|       | 33  | <1   | NA                          |
|       | 27  | <1   | NA                          |
|       | 20  | <1   | NA                          |
|       | 49  | <1   | NA                          |
|       | 24  | <1   | NA                          |
| ORF7a | 120 | 41.4 | NA                          |
|       | 82  | 41.2 | FEL; FUBAR; MEME; This Work |
|       | 45  | 1.5  | FEL; FUBAR; MEME            |
|       | 116 | <1   | FEL; FUBAR; MEME            |
|       | 71  | <1   | NA                          |
|       | 118 | <1   | FEL; FUBAR                  |
|       | 73  | <1   | NA                          |
|       | 34  | <1   | FUBAR                       |
|       | 84  | <1   | NA                          |
|       | 14  | <1   | NA                          |
| ORF7b | 40  | 39.6 | This Work                   |
|       | 5   | <1   | NA                          |
|       | 42  | <1   | This Work                   |
|       | 43  | <1   | This Work                   |
|       | 31  | <1   | NA                          |

|      |     |     |                  |
|------|-----|-----|------------------|
|      | 4   | <1  | This Work        |
|      | 15  | <1  | NA               |
|      | 32  | <1  | NA               |
|      | 1   | <1  | NA               |
|      | 41  | <1  | NA               |
|      | 24  | 3.5 | NA               |
|      | 92  | 2.7 | NA               |
|      | 11  | 1.7 | FUBAR            |
|      | 65  | <1  | FEL; FUBAR       |
| ORF8 | 120 | <1  | NA               |
|      | 67  | <1  | FUBAR            |
|      | 51  | <1  | FUBAR            |
|      | 121 | <1  | FEL; FUBAR; MEME |
|      | 100 | <1  | FEL; FUBAR; MEME |
|      | 84  | <1  | FUBAR            |
